# Supplementary material for: Synchronized Drumming Enhances Activity in the Caudate and Facilitates Prosocial Commitment - If the Rhythm Comes Easily
Source: PLoS One. 2011 Nov 16;6(11):e27272. doi: 10.1371/journal.pone.0027272 (PMC3217964; doi:10.1371/journal.pone.0027272)
Supplement: Table S5 — Mean and standard deviation of the asynchronies of the participant's button presses relative the demonstrated rhythm. (DOC) [file pone.0027272.s009.doc]

**Table S5.** Mean and standard deviation of the asynchronies of the participant’s button presses relative the demonstrated rhythm.

| MEAN | Note  2 | Note  3 | Note  4 | Note  5 | Note  6 * | Note  7 | Note  8 | Note 9 | Note  10 |
| --- | --- | --- | --- | --- | --- | --- | --- | --- | --- |
| synch (ms) | -68.3 | -12.2 | -17.1 | -3.4 | -291.2 | -2.3 | -11.5 | 15.3 | -15.7 |
| Asynch (ms) | -62.4 | -16.4 | -21.6 | 16.3 | -315.4 | -15.7 | 16.5 | -0.25 | 5.9 |
|  |  |  |  |  |  |  |  |  |  |
| SD |  |  |  |  |  |  |  |  |  |
| synch (ms) | 45.9 | 20.8 | 22.8 | 24.1 | 52.6 | 27.3 | 29.6 | 24 | 24.9 |
| Asynch (ms) | 67.2 | 30.1 | 34.3 | 47.7 | 77.6 | 33.0 | 33 | 43.8 | 40.3 |

Note: *6th beat after the break is always played too early by the participants. Asynchronies are calculated relative to the preceding note, taking into account the duration of the requested rhythm (e.g.,[(onset beat3 – onset beat 2) – (requested duration, i.e. 300ms)].
